# Supplementary material for: Trends in the incidence and outcome of sepsis using data from a Japanese nationwide medical claims database-the Japan Sepsis Alliance (JaSA) study group-
Source: Springer Nature journal article supplement (doi:10.1186/s13054-021-03762-8), 2021-09-16
Supplement: MOESM2 [file 19669396]

**Figure S1.** Annual change in the number of patients with sepsis and deaths in sepsis

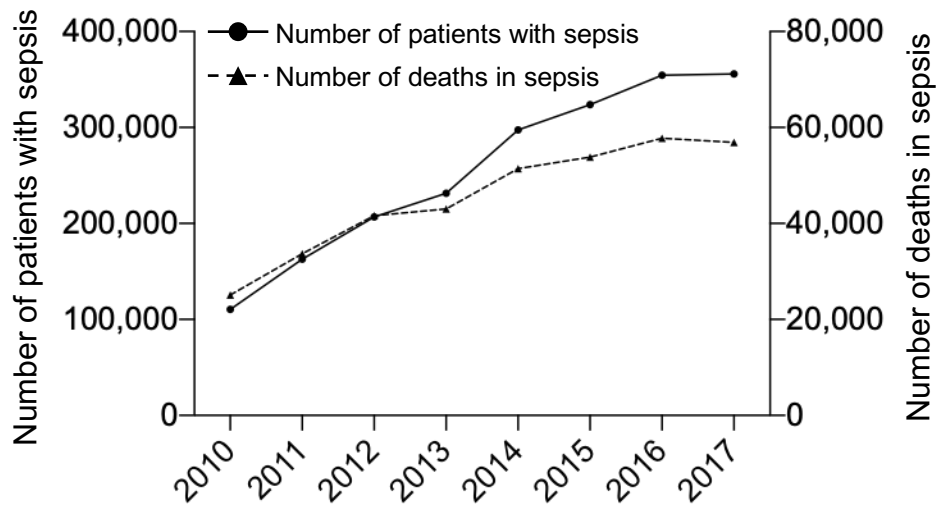

Number of patients with sepsis: +36,810/y [95% CI, +30,050 to +43,564],  $R^2=0.97$ ,  $P<0.0001$

Number of deaths in sepsis: +5,138/y [95% CI, +3,781 to +6,495],  $R^2=0.93$ ,  $P<0.0001$

Error bars indicate 95% CI. CI, confidence interval
