# Supplementary material for: Trends in the incidence and outcome of sepsis using data from a Japanese nationwide medical claims database-the Japan Sepsis Alliance (JaSA) study group-
Source: Springer Nature journal article supplement (doi:10.1186/s13054-021-03762-8), 2021-09-16
Supplement: MOESM3 [file 19669396]

**Figure S2a.** Annual change in the in-hospital mortality rate according to the age subgroups by dividing into units of 10 years

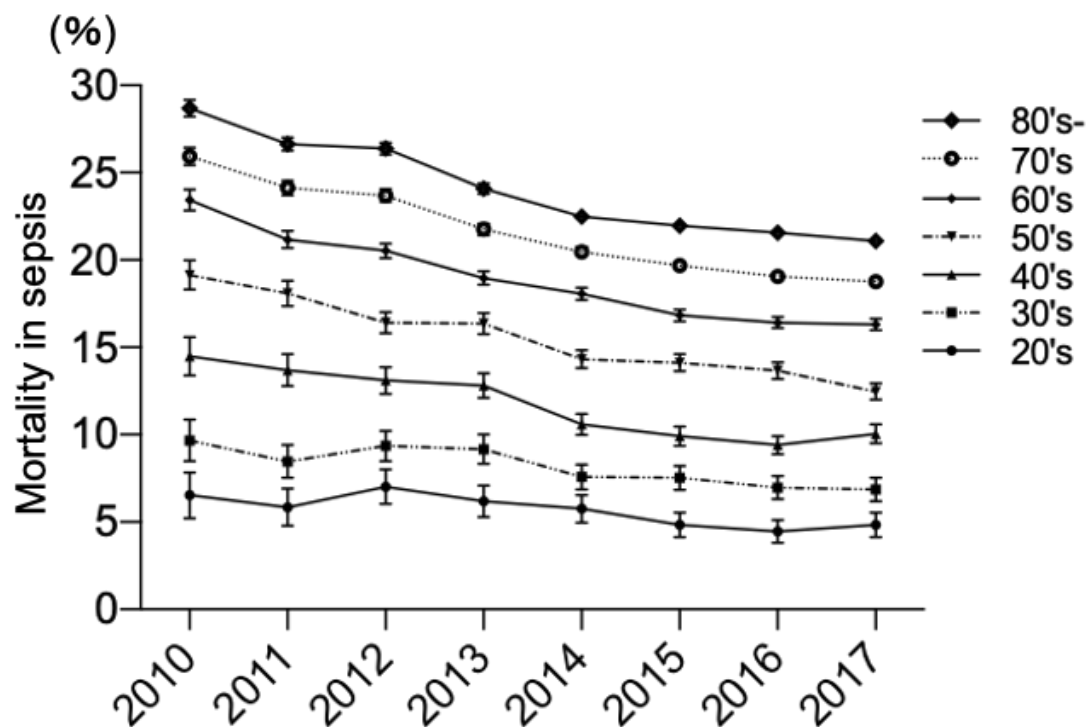

≥80 years (80's-): -1.11%/y [95% CI, -1.40% to -0.83%],  $R^2=0.94$ ,  $P<0.0001$

70–79 years (70's): -1.06%/y [95% CI, -1.27% to -0.84%],  $R^2=0.96$ ,  $P<0.0001$

60–69 years (60's): -1.02%/y [95%CI, -1.27% to -0.77%],  $R^2=0.94$ ,  $P<0.0001$

50–59 years (50's): -0.93%/y [95%CI, -1.11% to -0.74%],  $R^2=0.96$ ,  $P<0.0001$

40–49 years (40's): -0.77%/y [95% CI, -1.02% to -0.51%],  $R^2=0.90$ ,  $P=0.0003$

30–39 years (30's): -0.41%/y [95%CI, -0.61% to -0.21%],  $R^2=0.81$ ,  $P=0.0024$

20–29 years (20's): -0.31%/y [95%CI, -1.51% to -0.10%],  $R^2=0.69$ ,  $P=0.011$

Error bars indicate 95% CI. CI: confidence interval
