# Supplementary material for: Trends in the incidence and outcome of sepsis using data from a Japanese nationwide medical claims database-the Japan Sepsis Alliance (JaSA) study group-
Source: Springer Nature journal article supplement (doi:10.1186/s13054-021-03762-8), 2021-09-16
Supplement: MOESM4 [file 19669396]

**Figure S2b.** Annual change in the length of hospital stay according to the age subgroups by dividing into units of 10 years

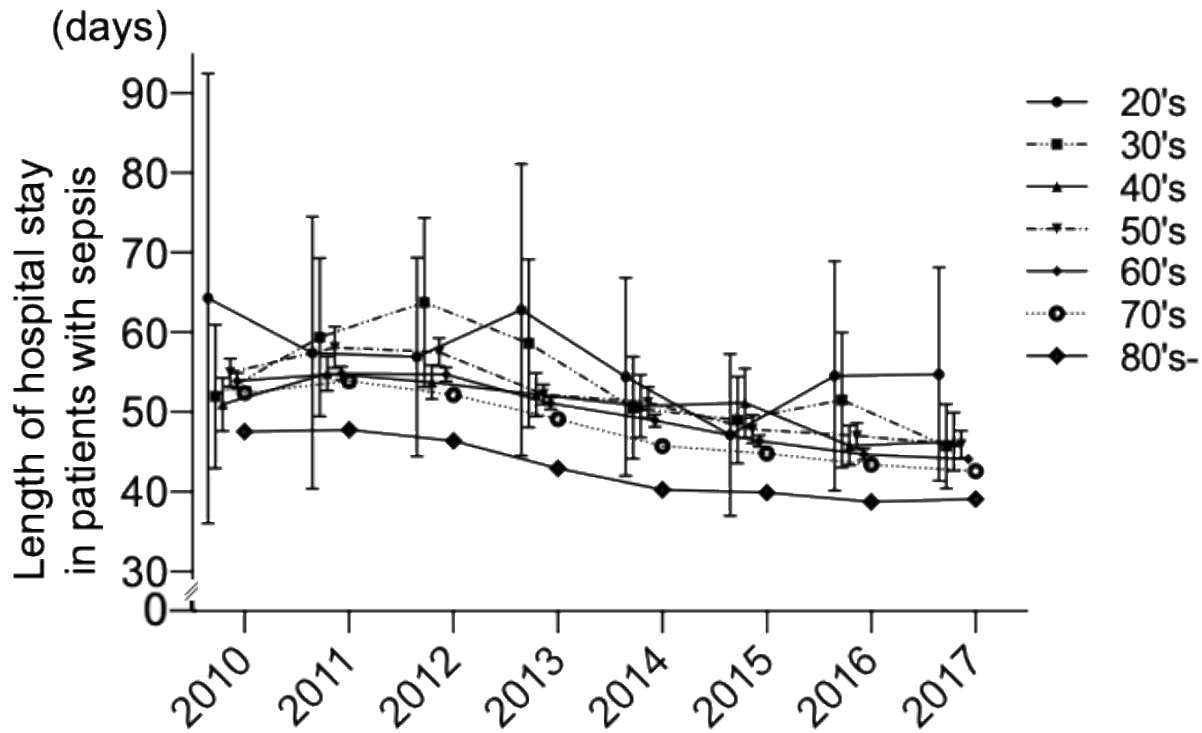

20–29 years (20's): -1.42%/y [95% CI, -3.08% to 0.25%],  $R^2=0.42$ ,  $P=0.082$

30–39 years (30's): -1.62%/y [95% CI, -3.52% to 0.29%],  $R^2=0.42$ ,  $P=0.083$

40–49 years (40's): -1.04%/y [95% CI, -1.84% to -0.23%],  $R^2=0.62$ ,  $P=0.020$

50–59 years (50's): -1.77%/y [95% CI, -2.53% to -1.01%],  $R^2=0.84$ ,  $P=0.0013$

60–69 years (60's): -1.75%/y [95% CI, -2.27% to -1.23%],  $R^2=0.92$ ,  $P=0.0002$

70–79 years (70's): -1.75%/y [95% CI, -2.25% to -1.25%],  $R^2=0.92$ ,  $P=0.0001$

≥80 years (80's-): -1.50%/y [95% CI, -1.99% to -1.02%],  $R^2=0.90$ ,  $P=0.0003$

Error bars indicate 95% CI. CI: confidence interval
